# Supplementary material
Source: PubMed Central journal article supplement (PMC2042175)
Supplement: pnas_0705466104v2_1.pdf [file pnas_0705466104v2_1.pdf]

## SI Data Set: Comparison of NMR distance restraints differing significantly from open, closed, and vdB crystal structures

| NMR                                                                        | Open | Closed | vdB  |
|----------------------------------------------------------------------------|------|--------|------|
| <b>N terminus:</b>                                                         |      |        |      |
| assign (resid 4 and name HN) (resid 6 and name HN) med NOE (upl 5.0 Å)     | 7.3  | 5.8    | 5.9  |
| <b>Loop 2:</b>                                                             |      |        |      |
| assign (resid 60 and name HN) (resid 62 and name HN) med NOE (upl 5.0 Å)   | 7.3  | 5.9    | n.d. |
| <b>Turn 4:</b>                                                             |      |        |      |
| assign (resid 160 and name HN) (resid 164 and name HN) med NOE (upl 5.0 Å) | 9.8  | 9.8    | 9.8  |
| assign (resid 161 and name HN) (resid 163 and name HN) med NOE (upl 5.0 Å) | 6.6  | 6.9    | 6.8  |
| assign (resid 161 and name HN) (resid 164 and name HN) med NOE (upl 5.0 Å) | 6.1  | 6.4    | 6.3  |
